# Supplementary material for: Interaction of septin 7 and DOCK8 in equine lymphocytes reveals novel insights into signaling pathways associated with autoimmunity
Source: Sci Rep. 2018 Aug 17;8:12332. doi: 10.1038/s41598-018-30753-7 (PMC6098150; doi:10.1038/s41598-018-30753-7)
Supplement: Supplementary file 1 — Supplementary Information [file 41598_2018_30753_MOESM1_ESM.pdf]

## **Supplementary Information**

### **Interaction of septin 7 and DOCK8 in equine lymphocytes reveals novel insights into signaling pathways associated with autoimmunity**

Melanie Schauer<sup>1</sup>, Kristina J H Kleinwort<sup>1</sup>, Roxane L Degroote<sup>1</sup>, Carmen Wiedemann<sup>1</sup>, Elisabeth Kremmer<sup>2</sup>, Stefanie M Hauck<sup>3</sup>, Cornelia A Deeg<sup>1\*</sup>

<sup>1</sup> Chair for Animal Physiology, Department of Veterinary Sciences, LMU Munich, 80539 Munich, Germany

<sup>2</sup> Institute for Molecular Immunology, Helmholtz Center Munich, German Research Center for Environmental Health GmbH, 81377 Munich, Germany

<sup>3</sup> Research Unit Protein Science, Helmholtz Center Munich, German Research Center for Environmental Health GmbH, 80939 Munich, Germany

\*Corresponding author:

Cornelia A. Deeg, Chair for Animal Physiology, Department of Veterinary Sciences, LMU Munich, Veterinärstr. 13, D-80539 Munich. E-mail: [Cornelia.Deeg@lmu.de](mailto:Cornelia.Deeg@lmu.de),

Phone: + 49 (0)89–21802551

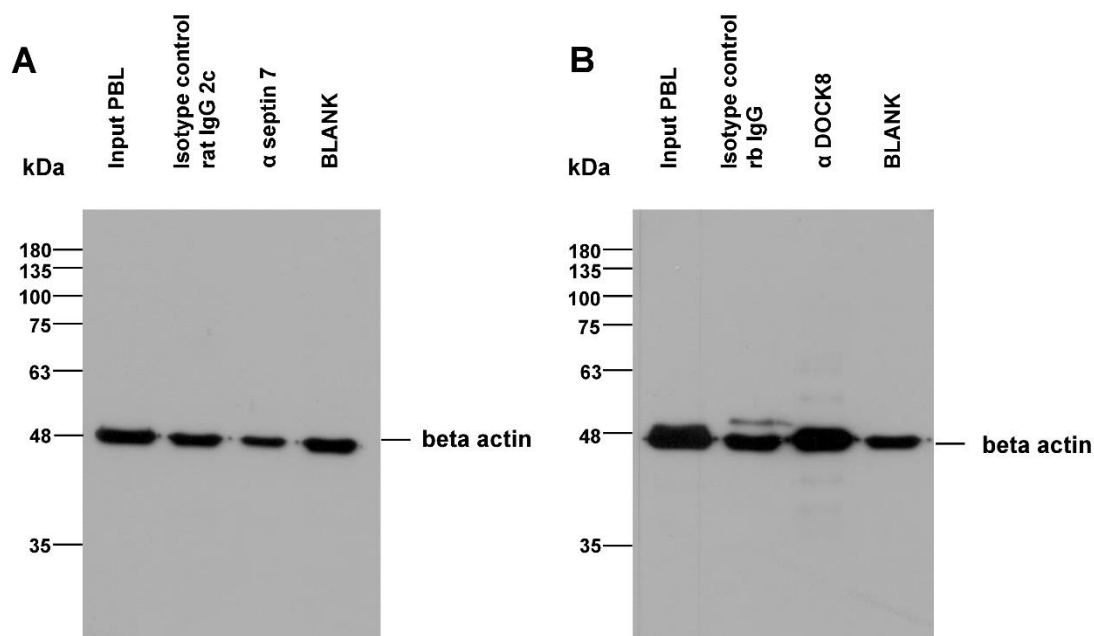

**Supplementary Figure S1:**

**Original full-length blots of Panel A + B in Figure 1. (A)** Beta actin signal abundance of PBL-lysate, isotype control (rat IgG 2c), blank and immunoprecipitate of septin 7. **(B)** Beta actin signal abundance of PBL-lysate, isotype control (rabbit IgG), blank and immunoprecipitate of DOCK8.

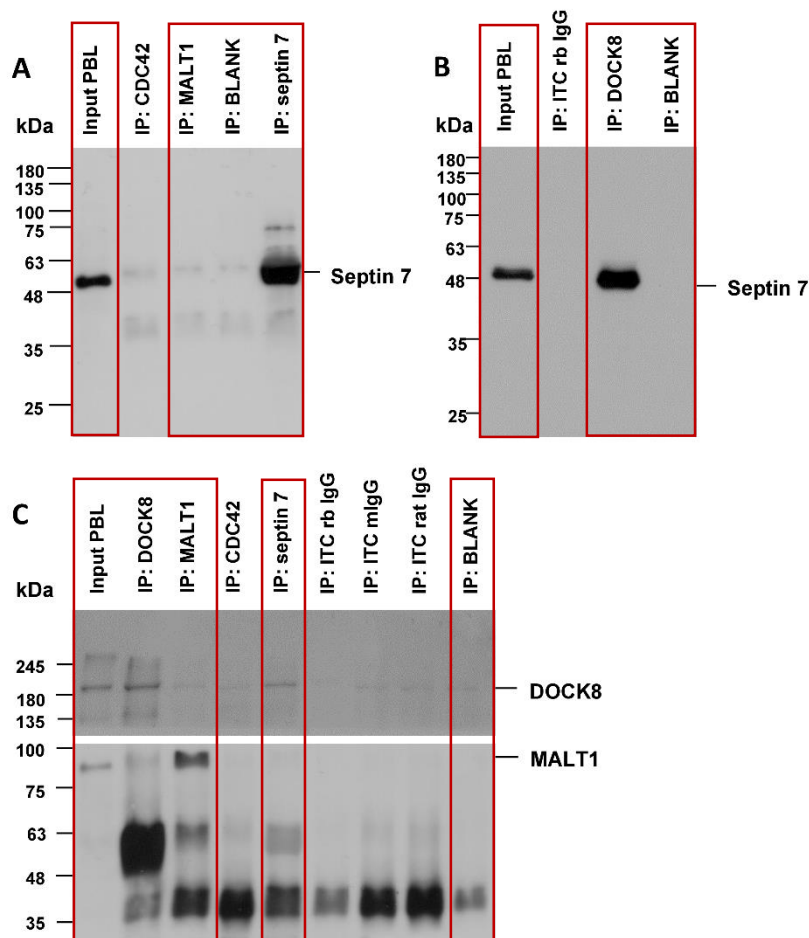

### Supplementary Figure S2:

**Grouped original full-length blots of Panel C in Figure 1 (marked lanes are shown in Figure 1, Panel C): (A + B)** Septin 7 was detected in immunoprecipitates of DOCK8 (Panel B; IP: DOCK8) and septin 7 (Panel A; IP: septin 7) as well as in PBL-lysates (Panel A+B: Input PBL). Septin 7 was not precipitated by MALT1 (Panel A: IP: MALT1) or isotype control (Panel B: IP: ITC rb IgG). Immunoprecipitation of CDC42 did not work due to failure of antibody-binding. **(C)** Blot membrane was divided and incubated with polyclonal anti DOCK8 and polyclonal anti MALT1, raised in rabbit. DOCK8 was detected in immunoprecipitates of septin 7 (IP: septin7) and DOCK8 (IP: DOCK8) as well as in PBL-lysate (Input PBL). DOCK8 was not precipitated by MALT1 (IP: MALT1) or isotype controls (IP: ITC rb IgG, IP: ITC rat IgG). MALT1 was detected in immunoprecipitate of MALT1 (IP: MALT1) and in PBL-lysate (Input PBL), but not in immunoprecipitates of DOCK8 (IP: DOCK8), septin 7 (IP: septin 7) or respective isotype controls (IP: ITC rb IgG, IP: ITC rat IgG).

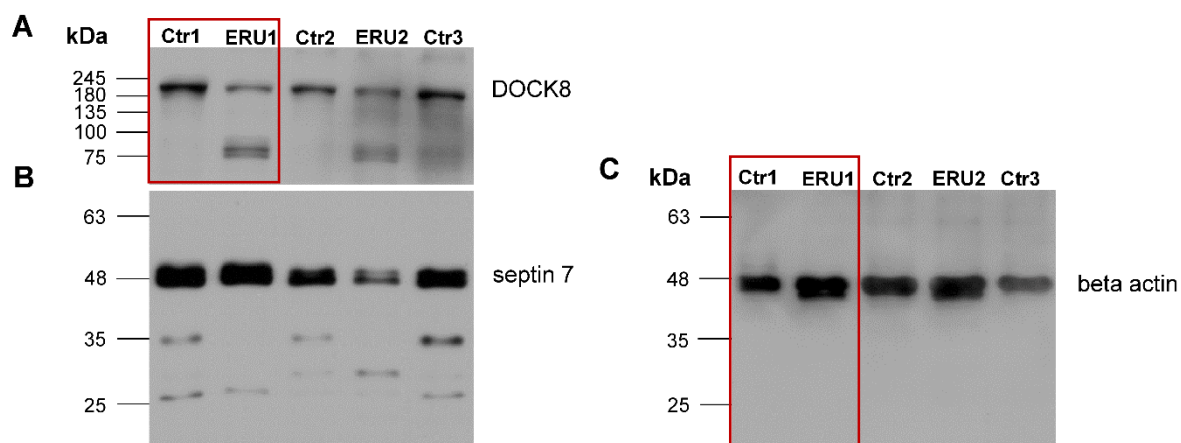

### Supplementary Figure S3:

**Grouped original full-length blot (A-C cropped from the same membrane) of Figure 3 (marked lanes are shown in Figure 3A).** Blot membrane was divided (A+B) and incubated with different antibodies. All abundances were normalized to respective beta actin signals (C) on the same membrane. **(A)** Signal abundances of DOCK8 in PBL of controls and ERU detected by western blot. **(B)** Signal abundances of septin 7 on same membrane. **(C)** Beta actin signal abundance.

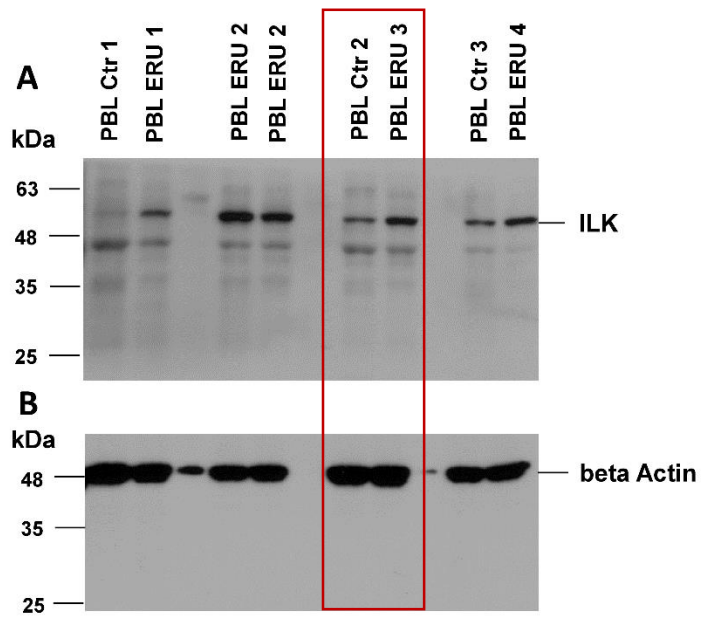

**Supplementary Figure S4:**

**Grouped original full-length blot (A+B on same membrane) of Figure 5A (marked lanes are shown in Figure 5A). (A)** Signal abundances of ILK in PBL of controls and ERU detected by western blot. **(B)** All abundances were normalized to beta actin signal abundance on the same membrane.

|                                            | <b>Present study</b>                                                                                                                                                                                              | <b><i>Tokhtaeva et al., 2015</i></b>                                                                                                                                                                            | <b><i>Schneider et al., 2013</i></b> | <b><i>Nakahira et al., 2010</i></b>                                         | <b><i>Spiliotis et al., 2005</i></b>               | <b><i>Kinoshita et al., 2002</i></b>       |
|--------------------------------------------|-------------------------------------------------------------------------------------------------------------------------------------------------------------------------------------------------------------------|-----------------------------------------------------------------------------------------------------------------------------------------------------------------------------------------------------------------|--------------------------------------|-----------------------------------------------------------------------------|----------------------------------------------------|--------------------------------------------|
| <b>Bait protein</b>                        | Septin 7                                                                                                                                                                                                          | Septin 2                                                                                                                                                                                                        | CDc11p septin                        | Septins 1-10<br>(septin 7 interactors shown)                                | Septin 2, septin 6                                 | Septin 2, septin 6, septin 7 (shown)       |
| <b>Interacting Proteins (gene symbols)</b> | <b>ARPC2</b> , H2A, <b>CDC42</b> , CAPZA1, <b>MYL6</b> , <b>ACTB</b> , <b>SEP6</b> , HIST1H2BJ, VIM, FGA, CRP, <b>ACTN1</b> , <b>SEP7</b> , DOCK8, <b>MYO1G</b> , <b>FLOT2</b> , S100A8, TMOD3, CTSG, <b>SEP2</b> | <b>SEP7</b> , SEP11, <b>SEP6</b> , <b>SEP2</b> , SEP8, SEP3, SEP9, SEP5, SEP4, SEP10, CLTC, FLOT1, <b>FLOT2</b> , NSF, ARF1, DMN1, AP2A2, AP3B2, AP2S1, STXBP1, SYNJ1, SYN2, VAPB, SYNGR3, SYP, SYT1, Chaperons | <b>MYO1</b> , BNI5P                  | <b>SEP6</b> , SEP9, SEP4, SEP1, SEP10, SEP11, RALBP1, ANKRD12, ZNF451, CENP | <b>Actin cytoskeleton</b> , Phospholipid membrane, | <b>Actin Cytoskeleton</b>                  |
| <b>Model</b>                               | Horse                                                                                                                                                                                                             | Mouse                                                                                                                                                                                                           | Yeast                                | Human                                                                       | HeLa cells, MDCK cells                             | Human                                      |
| <b>Method</b>                              | Co-IP; LC-MS/MS                                                                                                                                                                                                   | Co-IP; nLC-MS/MS                                                                                                                                                                                                | Split-UB, Pull-down assay            | Yeast two-hybrid                                                            | Immunofluorescence                                 | Co-sedimentation assay, immunofluorescence |

**Supplementary Table 1: Comparison of present study with known septin interactors from published studies**
